# Supplementary material for: SERS active silk silver films as a platform for osteogenic biomarker detection
Source: Royal Society of Chemistry journal article supplement (doi:10.1039/d5tb02229k), 2026-01-01
Supplement: d5tb02229k1.pdf [file d5tb02229k1.pdf]

**SERS Active Silk Silver Films as a Platform for Osteogenic Biomarker Detection**

Namrata Tiwari,<sup>1</sup> Manleen Kaur,<sup>1</sup> Ritu Das,<sup>2</sup> Nitish Kumar,<sup>1</sup> Neetu Singh<sup>1,3\*</sup>

<sup>1</sup>Centre for Biomedical Engineering, Indian Institute of Technology Delhi, Hauz Khas, New Delhi 110016, India

<sup>2</sup> Department of Mechanical Engineering, Koç University, Rumelifeneri Yolu, Sariyer, Istanbul 34450 Turkey

<sup>3</sup>Biomedical Engineering Unit, All India Institute of Medical Sciences, Ansari Nagar, New Delhi 110029, India

\*Corresponding authors: N. Singh: [sneetu@cbme.iitd.ac.in](mailto:sneetu@cbme.iitd.ac.in)

| Study                                                     | Silk Source / Matrix          | Ag Incorporation Strategy                                                  | Ag Size / Morphology            | Primary Functionality                     | Limitations in Prior Work                                                                    | What Is New in Your Platform                                                                                   |
|-----------------------------------------------------------|-------------------------------|----------------------------------------------------------------------------|---------------------------------|-------------------------------------------|----------------------------------------------------------------------------------------------|----------------------------------------------------------------------------------------------------------------|
| He et al., 2017 (Sericin-AgNPs)                           | Sericin solution              | Light-assisted reduction of AgNO <sub>3</sub> by sericin tyrosine residues | 20–40 nm AgNPs                  | Antibacterial, stable colloidal AgNPs     | No structural matrix; no spatial control; no sensing capability; no atomic-scale confinement | Silk fibroin solid matrix enabling nanocluster confinement + SERS hotspot generation                           |
| Al Masud et al., 2021 (Sericin-AgNPs)                     | Sericin extract               | Sericin acts as reducer and stabilizer                                     | 20–70 nm AgNPs                  | Antibacterial against MDR pathogens       | Large particles; aggregation; antibacterial only; no controlled nanoscale clustering         | Sub-50-nm clusters embedded within $\beta$ -sheet domains $\rightarrow$ controllable, homogeneous distribution |
| Hydroxyapatite/Ag @ Silk Fibroin Coating (ACS Omega 2021) | Silk fibroin coating with nHA | UV-triggered AgNP growth on nHA nucleation sites                           | ~40 nm AgNP or nHA/Ag complexes | Bone implants, antibacterial + osteogenic | Large AgNPs; rough coatings; no optical functionality; no nanoscale SERS hotspots            | Smooth SF film with dispersed clustered Ag species enabling high-sensitivity SERS                              |
| Silk Fibroin-AgNP films (various wound healing systems)   | Silk fibroin or composite     | Chemical reduction or green synthesis                                      | 10–100 nm particles, broad      | Antimicrobial, wound-healing matrices     | Focus only on antibacterial; no spectroscopic function; polydisperse Ag                      | Highly monodisperse Ag clusters (0.25–0.5%) proven by DLS homogeneity                                          |
| Review of Silk-Ag composites (Biomimetics 2025)           | Various (SF, sericin)         | Summary of green AgNP synthesis                                            | 5–100 nm                        | Antibacterial biomaterials                | No SERS systems exist; no embedded nanocluster platforms; no biomarker detection             | First demonstration of immobilized Ag nanoclusters within silk for biomarker-specific SERS                     |

**Table ST1:** Comparative analysis of previously reported silk–silver nanoparticle (AgNP) systems and the novelty of the present silk silver film platform<sup>1–5</sup>.

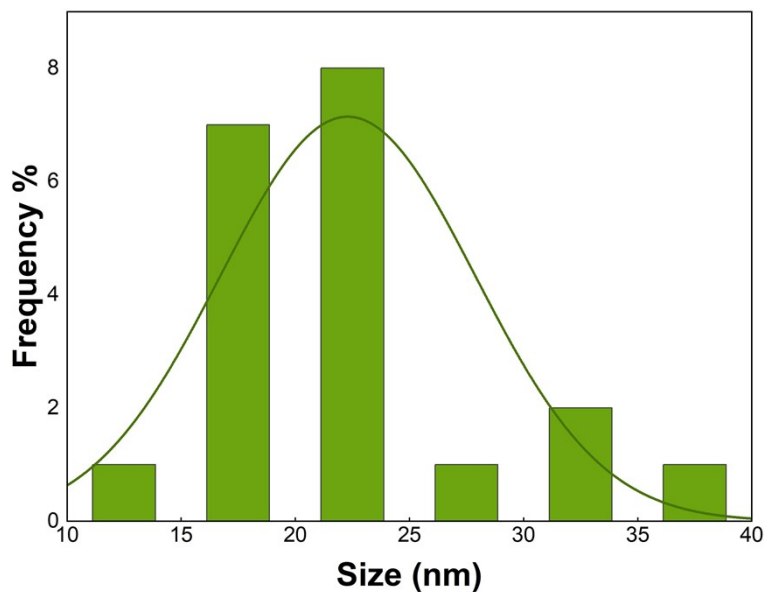

**Figure S1:** Particle size distribution of silver nanoclusters formed in the 0.5% silk silver fibroin solution. Histogram analysis shows that most nanoclusters fall within the 18–25 nm range, with a Gaussian fit indicating a narrow and unimodal size distribution. The frequency distribution

confirms uniform nucleation and controlled growth of silver nanoclusters within the silk fibroin matrix.

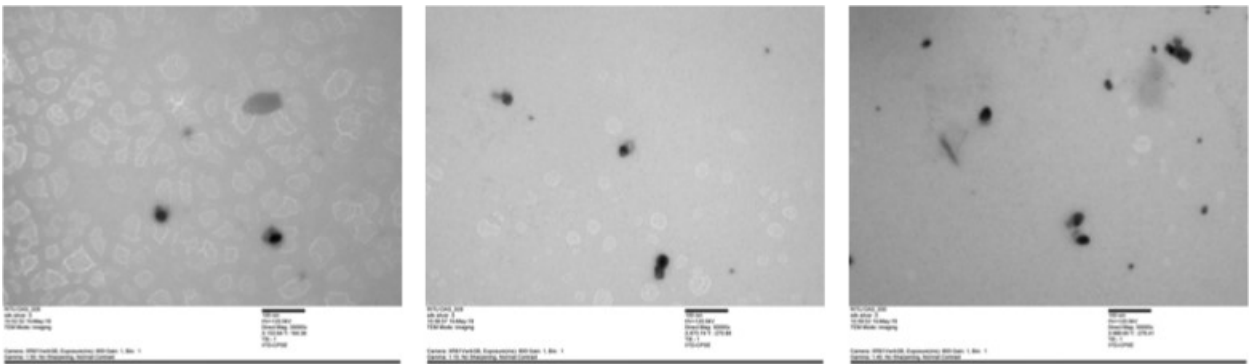

**Figure S2:** TEM micrographs of silver nanoclusters synthesized within the silk fibroin matrix at 0.5% silver concentration. (Scale: 100 nm).

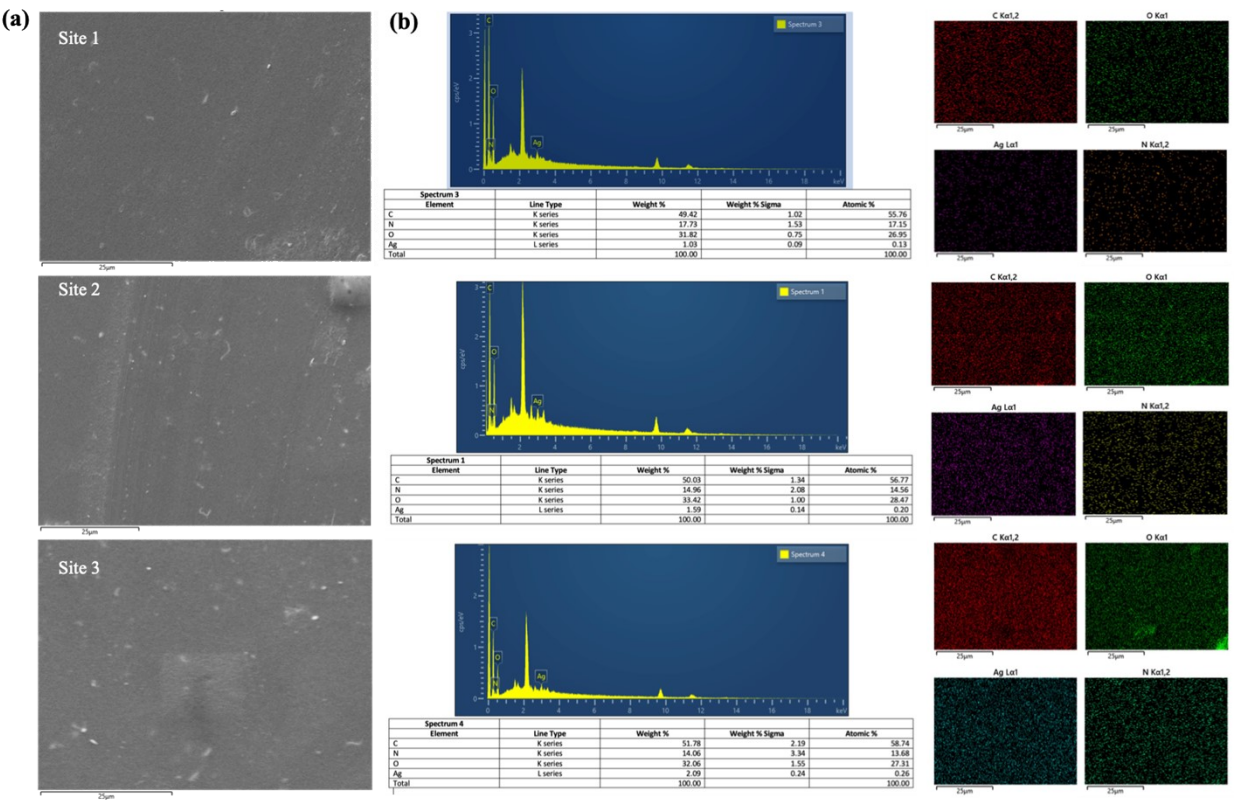

**Figure S3:** (a) FESEM micrographs and corresponding EDX spectra collected from three different regions (Site 1, Site 2, and Site 3) of the 0.5% silk silver film, and (b) EDX analysis confirms the presence of Ag along with the expected silk-derived elements (C, N, O) at all sites. Showing Ag

content at surface (1.03–2.89 wt%), its consistent detection across multiple regions with elemental mapping indicates homogeneous nanocluster incorporation throughout the silk matrix.

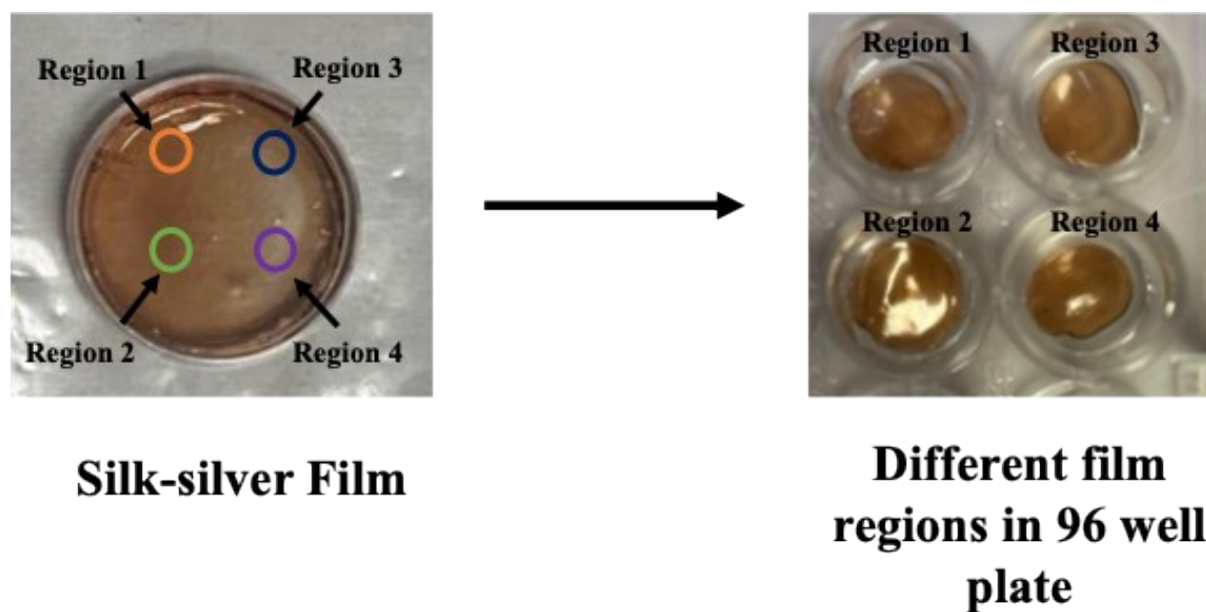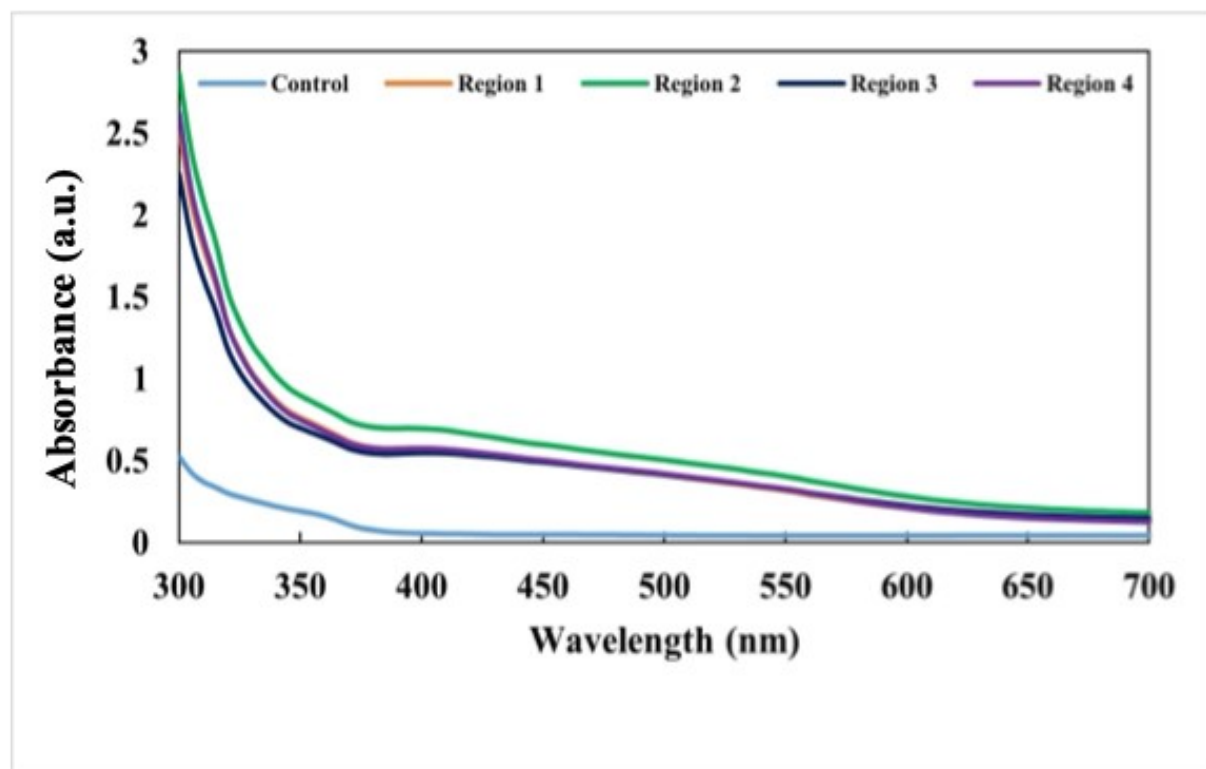

**Figure S4:** UV–Vis absorbance spectra of samples collected from different regions of the silk silver film with control as pure silk film.

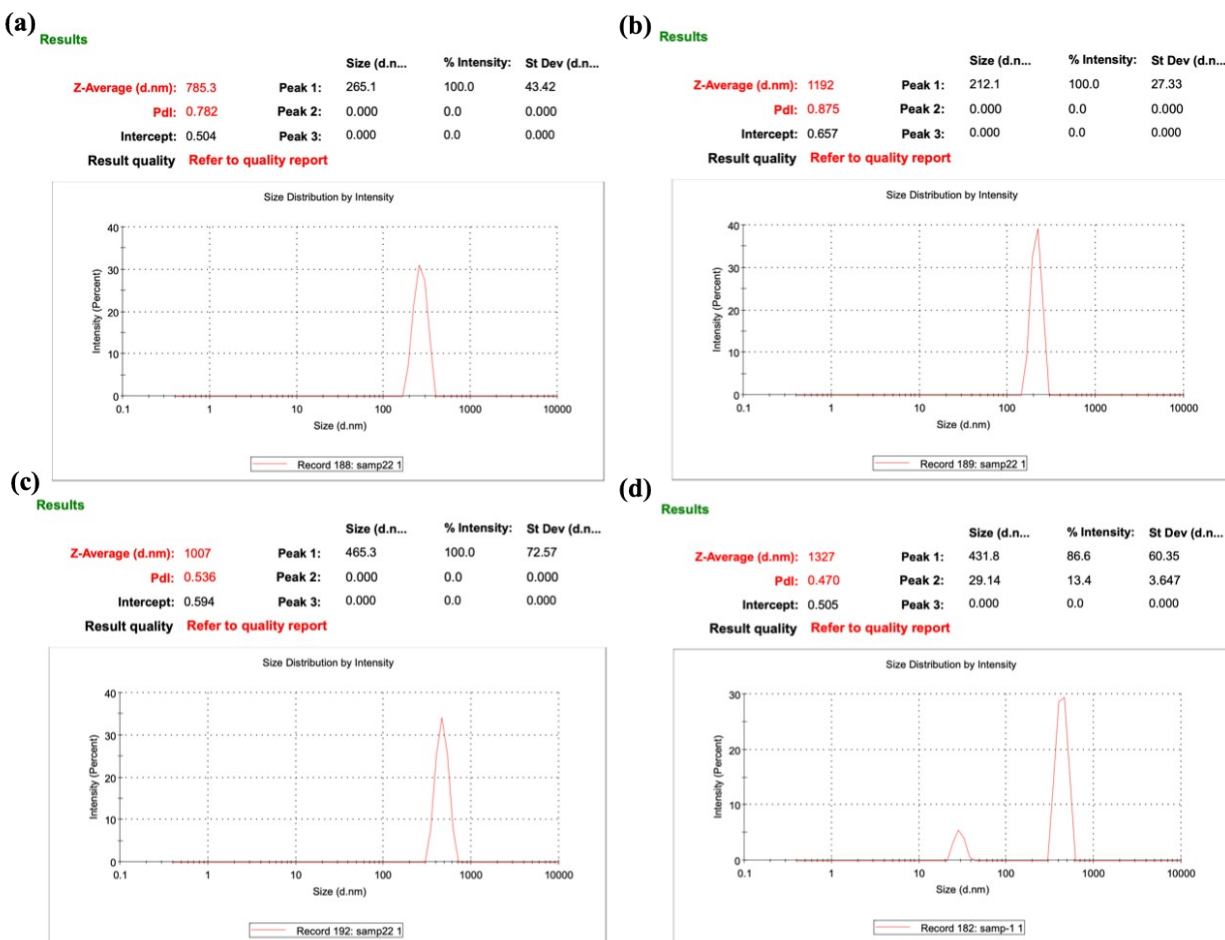

**Figure S5:** Dynamic light scattering (DLS) analysis of silk silver fibroin solution prepared with different  $\text{AgNO}_3$  concentrations. (a) 0.25%, (b) 0.5% samples exhibit narrow, unimodal intensity distributions with peak hydrodynamic diameters of 265.1 nm and 212.1 nm, respectively, indicating homogeneous and stable nanocluster assemblies. In contrast, (c) the 0.75% and (d) 1% formulations show broadened or multimodal size distributions, with peak sizes shifting to 465.3 nm and 431.8 nm, respectively, reflecting increased polydispersity and early aggregation. These results confirm that  $\text{AgNO}_3$  concentrations above 0.5% exceed the stabilizing capacity of silk fibroin, leading to loss of uniform nanocluster formation.

| Sample Name      | Day 1 (Weight in mg) | Day 7 (Weight in mg) |
|------------------|----------------------|----------------------|
| Silk Film        | $78.2 \pm 0.5$ mg    | $77.9 \pm 0.4$ mg    |
| Silk-Silver Film | $89.4 \pm 0.6$ mg    | $110.2 \pm 0.8$ mg   |

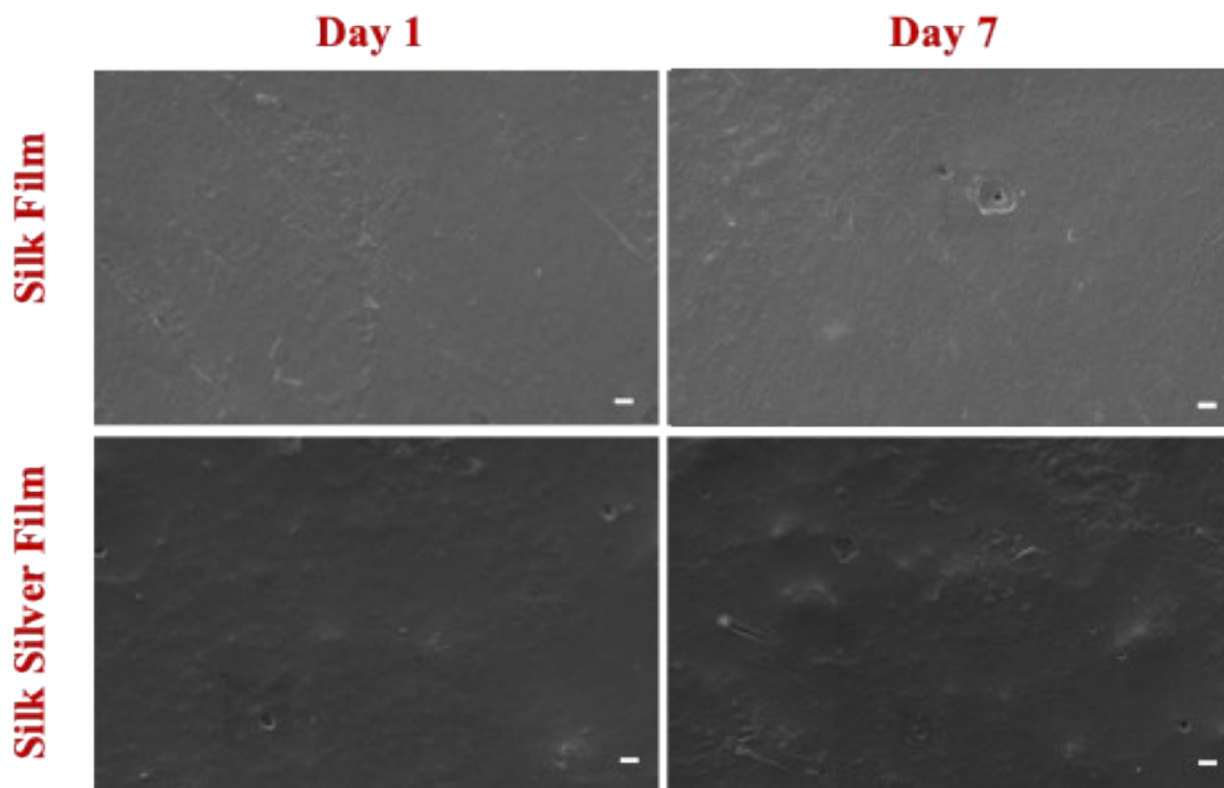

**Figure S6:** SEM images of the silk film, silk silver films at day 1 and day 7 to observe the biodegradability of the films when incubated in cell culture media (DMEM) for 7 days at 37 °C. (Scale:2  $\mu$ m)

#### References:

1. Zhang, Y. *et al.* Biomimetic Inorganic Nanoparticle-Loaded Silk Fibroin-Based Coating with Enhanced Antibacterial and Osteogenic Abilities. *ACS Omega* 6, 30027–30039 (2021).
2. Pollini, M., D’Urso, F., Broccolo, F. & Paladini, F. Silver Nanoparticle–Silk Protein Nanocomposites: A Synergistic Biomimetic Approach for Advanced Antimicrobial Applications. *Biomimetics* 10, 669 (2025).
3. Felemban, M. *et al.* Extracellular matrix component expression in human pluripotent stem cell-derived retinal organoids recapitulates retinogenesis in vivo and reveals an important role for IMPG1 and CD44 in the development of photoreceptors and interphotoreceptor matrix. *Acta Biomater* 74, 207–221 (2018).
4. He, H. *et al.* In situ green synthesis and characterization of sericin-silver nanoparticle composite with effective antibacterial activity and good biocompatibility. *Materials Science and Engineering: C* 80, 509–516 (2017).
5. Al Masud, Md. A. *et al.* Green synthesis of silk sericin-embedded silver nanoparticles and their antibacterial application against multidrug-resistant pathogens. *Journal of Genetic Engineering and Biotechnology* 19, 74 (2021).
